# Supplementary material for: Relevance of Trypanothione Reductase Inhibitors on Trypanosoma cruzi Infection: A Systematic Review, Meta‐Analysis, and In Silico Integrated Approach
Source: Hindawi journal article supplement (doi:10.1155/2018/8676578), 2018-01-01
Supplement: f1 [file 8676578.f1.pdf]

**Table S1.** Complete search strategy with search filters and number of studies recovered in databases PubMed-Medline, Scopus and Web of Sciences.

| <i>PubMed-MEDLINE – Search filters</i>                                                                                                                                                                                                                                                                                                                                                                                                                                                                                                                                                                                                                                                                                                                                                                                                                                                                                                                                                                                                                                                                                                                                                                                                                                        | <i>Retrieved records</i> |
|-------------------------------------------------------------------------------------------------------------------------------------------------------------------------------------------------------------------------------------------------------------------------------------------------------------------------------------------------------------------------------------------------------------------------------------------------------------------------------------------------------------------------------------------------------------------------------------------------------------------------------------------------------------------------------------------------------------------------------------------------------------------------------------------------------------------------------------------------------------------------------------------------------------------------------------------------------------------------------------------------------------------------------------------------------------------------------------------------------------------------------------------------------------------------------------------------------------------------------------------------------------------------------|--------------------------|
| <b>#1 Disease:</b>                                                                                                                                                                                                                                                                                                                                                                                                                                                                                                                                                                                                                                                                                                                                                                                                                                                                                                                                                                                                                                                                                                                                                                                                                                                            |                          |
| ("Chagas disease"[TIAB] OR "American trypanosomiasis"[TIAB] OR "Trypanosoma cruzi"[TIAB] OR "Trypanosoma cruzus"[TIAB])                                                                                                                                                                                                                                                                                                                                                                                                                                                                                                                                                                                                                                                                                                                                                                                                                                                                                                                                                                                                                                                                                                                                                       | 17.002                   |
| <b>#2 Therapeutic target / intervention:</b>                                                                                                                                                                                                                                                                                                                                                                                                                                                                                                                                                                                                                                                                                                                                                                                                                                                                                                                                                                                                                                                                                                                                                                                                                                  |                          |
| ("trypanothione reductase"[TIAB] OR "trypanothione reductase inhibitors"[TIAB])                                                                                                                                                                                                                                                                                                                                                                                                                                                                                                                                                                                                                                                                                                                                                                                                                                                                                                                                                                                                                                                                                                                                                                                               | 378                      |
| <b>#3 First animal filter:</b>                                                                                                                                                                                                                                                                                                                                                                                                                                                                                                                                                                                                                                                                                                                                                                                                                                                                                                                                                                                                                                                                                                                                                                                                                                                |                          |
| ("animal experimentation"[MeSH Terms] OR "models, animal"[MeSH Terms] OR "invertebrates"[MeSH Terms] OR "Animals"[Mesh:noexp] OR "animal population groups"[MeSH Terms] OR "chordata"[MeSH Terms:noexp] OR "chordata, nonvertebrate"[MeSH Terms] OR "vertebrates"[MeSH Terms:noexp] OR "amphibians"[MeSH Terms] OR "birds"[MeSH Terms] OR "fishes"[MeSH Terms] OR "reptiles"[MeSH Terms] OR "mammals"[MeSH Terms:noexp] OR "primates"[MeSH Terms:noexp] OR "artiodactyla"[MeSH Terms] OR "carnivora"[MeSH Terms] OR "cetacea"[MeSH Terms] OR "chiroptera"[MeSH Terms] OR "elephants"[MeSH Terms] OR "hyraxes"[MeSH Terms] OR "insectivora"[MeSH Terms] OR "lagomorpha"[MeSH Terms] OR "marsupialia"[MeSH Terms] OR "monotremata"[MeSH Terms] OR "perissodactyla"[MeSH Terms] OR "rodentia"[MeSH Terms] OR "scandentia"[MeSH Terms] OR "sirenia"[MeSH Terms] OR "xenarthra"[MeSH Terms] OR "haplorhini"[MeSH Terms:noexp] OR "strepsirhini"[MeSH Terms] OR "platyrrhini"[MeSH Terms] OR "tarsii"[MeSH Terms] OR "catarrhini"[MeSH Terms:noexp] OR "cercopithecidae"[MeSH Terms] OR "hylobatidae"[MeSH Terms] OR "hominidae"[MeSH Terms:noexp] OR "gorilla gorilla"[MeSH Terms] OR "pan paniscus"[MeSH Terms] OR "pan troglodytes"[MeSH Terms] OR "pongo pygmaeus"[MeSH Terms]) | 5.990.987                |

#### #4 Second animal filter:

((animals[Tiab] OR animal[Tiab] OR mice[Tiab] OR mus[Tiab] OR mouse[Tiab] OR murine[Tiab] OR woodmouse[Tiab] OR rats[Tiab] OR rat[Tiab] OR murinae[Tiab] OR muridae[Tiab] OR cottonrat[Tiab] OR cottonrats[Tiab] OR hamster[Tiab] OR hamsters[Tiab] OR cricetinae[Tiab] OR rodentia[Tiab] OR rodent[Tiab] OR rodents[Tiab] OR pigs[Tiab] OR pig[Tiab] OR swine[Tiab] OR swines[Tiab] OR piglets[Tiab] OR piglet[Tiab] OR boar[Tiab] OR boars[Tiab] OR "sus scrofa"[Tiab] OR ferrets[Tiab] OR ferret[Tiab] OR polecat[Tiab] OR polecats[Tiab] OR "mustela putorius"[Tiab] OR "guinea pigs"[Tiab] OR "guinea pig"[Tiab] OR cavia[Tiab] OR callithrix[Tiab] OR marmoset[Tiab] OR marmosets[Tiab] OR cebuella[Tiab] OR hapale[Tiab] OR octodon[Tiab] OR chinchilla[Tiab] OR chinchillas[Tiab] OR gerbillinae[Tiab] OR gerbil[Tiab] OR gerbils[Tiab] OR jird[Tiab] OR jirds[Tiab] OR merione[Tiab] OR meriones[Tiab] OR rabbits[Tiab] OR rabbit[Tiab] OR hares[Tiab] OR hare[Tiab] OR diptera[Tiab] OR flies[Tiab] OR fly[Tiab] OR dipteral[Tiab] OR drosophila[Tiab] OR drosophilidae[Tiab] OR cats[Tiab] OR cat[Tiab] OR carus[Tiab] OR felis[Tiab] OR nematoda[Tiab] OR nematode[Tiab] OR nematoda[Tiab] OR nematode[Tiab] OR nematodes[Tiab] OR sipunculida[Tiab] OR dogs[Tiab] OR dog[Tiab] OR canine[Tiab] OR canines[Tiab] OR canis[Tiab] OR sheep[Tiab] OR sheeps[Tiab] OR mouflon[Tiab] OR mouflons[Tiab] OR ovis[Tiab] OR goats[Tiab] OR goat[Tiab] OR capra[Tiab] OR capras[Tiab] OR rupicapra[Tiab] OR chamois[Tiab] OR haplorhini[Tiab] OR monkey[Tiab] OR monkeys[Tiab] OR anthropoidea[Tiab] OR anthropoids[Tiab] OR saguinus[Tiab] OR tamarin[Tiab] OR tamarins[Tiab] OR leontopithecus[Tiab] OR hominidae[Tiab] OR ape[Tiab] OR apes[Tiab] OR pan[Tiab] OR paniscus[Tiab] OR "pan paniscus"[Tiab] OR bonobo[Tiab] OR bonobos[Tiab] OR troglodytes[Tiab] OR "pan troglodytes"[Tiab] OR gibbon[Tiab] OR gibbons[Tiab] OR siamang[Tiab] OR siamangs[Tiab] OR nomascus[Tiab] OR symphalangus[Tiab] OR chimpanzee[Tiab] OR chimpanzees[Tiab] OR prosimians[Tiab] OR "bush baby"[Tiab] OR prosimian[Tiab] OR bush babies[Tiab] OR galagos[Tiab] OR galago[Tiab]

288.098

OR pongidae[Tiab] OR gorilla[Tiab] OR gorillas[Tiab] OR pongo[Tiab] OR pygmaeus[Tiab] OR "pongo pygmaeus"[Tiab] OR orangutans[Tiab] OR pygmaeus[Tiab] OR lemur[Tiab] OR lemurs[Tiab] OR lemuridae[Tiab] OR horse[Tiab] OR horses[Tiab] OR pongo[Tiab] OR equus[Tiab] OR cow[Tiab] OR calf[Tiab] OR bull[Tiab] OR chicken[Tiab] OR chickens[Tiab] OR gallus[Tiab] OR quail[Tiab] OR bird[Tiab] OR birds[Tiab] OR quails[Tiab] OR poultry[Tiab] OR poultries[Tiab] OR fowl[Tiab] OR fowls[Tiab] OR reptile[Tiab] OR reptilia[Tiab] OR reptiles[Tiab] OR snakes[Tiab] OR snake[Tiab] OR lizard[Tiab] OR lizards[Tiab] OR alligator[Tiab] OR alligators[Tiab] OR crocodile[Tiab] OR crocodiles[Tiab] OR turtle[Tiab] OR turtles[Tiab] OR amphibian[Tiab] OR amphibians[Tiab] OR amphibia[Tiab] OR frog[Tiab] OR frogs[Tiab] OR bombina[Tiab] OR salientia[Tiab] OR toad[Tiab] OR toads[Tiab] OR "epidalea calamita"[Tiab] OR salamander[Tiab] OR salamanders[Tiab] OR eel[Tiab] OR eels[Tiab] OR fish[Tiab] OR fishes[Tiab] OR pisces[Tiab] OR catfish[Tiab] OR catfishes[Tiab] OR siluriformes[Tiab] OR arius[Tiab] OR heteropneustes[Tiab] OR sheatfish[Tiab] OR perch[Tiab] OR perches[Tiab] OR percidae[Tiab] OR perca[Tiab] OR trout[Tiab] OR trouts[Tiab] OR char[Tiab] OR chars[Tiab] OR salvelinus[Tiab] OR "fathead minnow"[Tiab] OR minnow[Tiab] OR cyprinidae[Tiab] OR carps[Tiab] OR carp[Tiab] OR zebrafish[Tiab] OR zebrafishes[Tiab] OR goldfish[Tiab] OR goldfishes[Tiab] OR guppy[Tiab] OR guppies[Tiab] OR chub[Tiab] OR chubs[Tiab] OR tinca[Tiab] OR barbels[Tiab] OR barbus[Tiab] OR pimephales[Tiab] OR promelas[Tiab] OR "poecilia reticulata"[Tiab] OR mullet[Tiab] OR mullets[Tiab] OR seahorse[Tiab] OR seahorses[Tiab] OR mugil curema[Tiab] OR atlantic cod[Tiab] OR shark[Tiab] OR sharks[Tiab] OR catshark[Tiab] OR anguilla[Tiab] OR salmonid[Tiab] OR salmonids[Tiab] OR whitefish[Tiab] OR whitefishes[Tiab] OR salmon[Tiab] OR salmons[Tiab] OR sole[Tiab] OR solea[Tiab] OR "sea lamprey"[Tiab] OR lamprey[Tiab] OR lampreys[Tiab] OR pumpkinseed[Tiab] OR sunfish[Tiab] OR sunfishes[Tiab] OR tilapia[Tiab] OR tilapias[Tiab] OR turbot[Tiab] OR turbots[Tiab] OR flatfish[Tiab] OR flatfishes[Tiab] OR sciuridae[Tiab] OR squirrel[Tiab] OR squirrels[Tiab]

OR chipmunk[Tiab] OR chipmunks[Tiab] OR suslik[Tiab] OR susliks[Tiab]  
 OR vole[Tiab] OR voles[Tiab] OR lemming[Tiab] OR lemmings[Tiab] OR  
 muskrat[Tiab] OR muskrats[Tiab] OR lemmus[Tiab] OR otter[Tiab] OR  
 otters[Tiab] OR marten[Tiab] OR martens[Tiab] OR martes[Tiab] OR  
 weasel[Tiab] OR badger[Tiab] OR badgers[Tiab] OR ermine[Tiab] OR  
 mink[Tiab] OR minks[Tiab] OR sable[Tiab] OR sables[Tiab] OR gulo[Tiab]  
 OR gulos[Tiab] OR wolverine[Tiab] OR wolverines[Tiab] OR minks[Tiab]  
 OR mustela[Tiab] OR llama[Tiab] OR llamas[Tiab] OR alpaca[Tiab] OR  
 alpacas[Tiab] OR camelid[Tiab] OR camelids[Tiab] OR guanaco[Tiab] OR  
 guanacos[Tiab] OR chiroptera[Tiab] OR chiropteras[Tiab] OR bat[Tiab] OR  
 bats[Tiab] OR fox[Tiab] OR foxes[Tiab] OR iguana[Tiab] OR  
 iguanas[Tiab] OR xenopus laevis[Tiab] OR parakeet[Tiab] OR  
 parakeets[Tiab] OR parrot[Tiab] OR parrots[Tiab] OR donkey[Tiab] OR  
 donkeys[Tiab] OR mule[Tiab] OR mules[Tiab] OR zebra[Tiab] OR  
 zebras[Tiab] OR shrew[Tiab] OR shrews[Tiab] OR bison[Tiab] OR  
 bisons[Tiab] OR buffalo[Tiab] OR buffaloes[Tiab] OR deer[Tiab] OR  
 deers[Tiab] OR bear[Tiab] OR bears[Tiab] OR panda[Tiab] OR  
 pandas[Tiab] OR "wild hog"[Tiab] OR "wild boar"[Tiab] OR fitchew[Tiab]  
 OR fitch[Tiab] OR beaver[Tiab] OR beavers[Tiab] OR jerboa[Tiab] OR  
 jerboas[Tiab] OR capybara[Tiab] OR capybaras[Tiab]) NOT  
 medline[subset])

**Combined search:** (#1 AND #2) AND (#3 OR #4)

140

| <b>SCOPUS – Search filters</b>                                                                                                                                                                          | <b>Retrieved records</b> |
|---------------------------------------------------------------------------------------------------------------------------------------------------------------------------------------------------------|--------------------------|
| <p><b>#1 Disease:</b><br/>           ((TITLE-ABS-KEY("Chagas disease") OR TITLE-ABS-KEY("American trypanosomiasis") OR TITLE-ABS-KEY("Trypanosoma cruzi") OR TITLE-ABS-KEY("Trypanosoma cruzus"))))</p> | 23.654                   |
| <p><b>#2 Therapeutic target / Intervention:</b><br/>           ((TITLE-ABS-KEY("trypanothione reductase") OR TITLE-ABS-KEY("trypanothione reductase inhibitors"))))</p>                                 | 495                      |

**Combined search: #1 AND #2** 247

---

*Search limits: in vitro, review, conference paper, book chapter [exclude];  
animals [limit to]* 175

---

**WEB OF SCIENCE – Search filters** *Retrieved records*

---

**#1 Disease:**

TS=Chagas disease OR TS=American trypanosomiasis OR 21.596  
TS=Trypanosoma cruzi OR TS=Trypanosoma cruzus

**#2 Therapeutic target / Intervention:**

TS= trypanothione reductase OR TS= trypanothione reductase inhibitors 866

**#3 Animal filter:**

TS=mice OR TS=mouse OR TS=rat OR TS=rats OR TS=dog OR TS=dogs 3.674.547  
OR TS=rabbits OR TS=murine model OR TS=guinea pig OR TS=hamster  
OR TS=pig OR TS=animal model

**Combined search: #1 AND #2 AND #3** 48

---

**Table S2.** Analysis of methodological quality (reporting bias) of all studies included in the systematic review.

| Quality criteria / Studies included |                                                                              | Olmo et al. 2016 | Fauro et al. 2013 | Bazan et al. 2008 | Rivarola et al. 2005 | Lo Presti et al. 2004 | Rivarola et al. 2001 | Fournet et al. 2000 | Baillet et al. 1996 | Bazan et al. 2016 | Rivarola et al. 1999 | Strauss et al. 2013 | Gobbi et al. 2010 | Bustamante et al. 2010 | Paglini-Oliva et al. 1998 | Criteria completed (n) | Criteria completed (%) |
|-------------------------------------|------------------------------------------------------------------------------|------------------|-------------------|-------------------|----------------------|-----------------------|----------------------|---------------------|---------------------|-------------------|----------------------|---------------------|-------------------|------------------------|---------------------------|------------------------|------------------------|
| <b><i>Title</i></b>                 |                                                                              |                  |                   |                   |                      |                       |                      |                     |                     |                   |                      |                     |                   |                        |                           |                        |                        |
| 1                                   | Accurate and concise description of the article content                      | Y                | Y                 | Y                 | Y                    | Y                     | Y                    | Y                   | Y                   | Y                 | Y                    | Y                   | Y                 | Y                      | Y                         | 15                     | 100.0                  |
| <b><i>Abstract</i></b>              |                                                                              |                  |                   |                   |                      |                       |                      |                     |                     |                   |                      |                     |                   |                        |                           |                        |                        |
| 2                                   | Background, research objectives, methods, principal findings and conclusions | Y                | Y                 | Y                 | Y                    | Y                     | Y                    | Y                   | Y                   | Y                 | Y                    | Y                   | Y                 | Y                      | Y                         | 15                     | 100.0                  |
| <b><i>Introduction</i></b>          |                                                                              |                  |                   |                   |                      |                       |                      |                     |                     |                   |                      |                     |                   |                        |                           |                        |                        |
| 3                                   | Sufficient scientific background                                             | Y                | Y                 | Y                 | Y                    | Y                     | Y                    | Y                   | Y                   | Y                 | Y                    | Y                   | Y                 | Y                      | Y                         | 15                     | 100.0                  |
| 4                                   | Explanation of the experimental approach                                     | Y                | Y                 | Y                 | Y                    | Y                     | Y                    | Y                   | Y                   | Y                 | Y                    | Y                   | Y                 | Y                      | Y                         | 15                     | 100.0                  |
| <b><i>Objectives</i></b>            |                                                                              |                  |                   |                   |                      |                       |                      |                     |                     |                   |                      |                     |                   |                        |                           |                        |                        |
| 5                                   | Clear primary and secondary objectives                                       | Y                | Y                 | Y                 | Y                    | Y                     | Y                    | Y                   | Y                   | N                 | N                    | N                   | N                 | N                      | N                         | 9                      | 60.0                   |

Y, criteria completed; N, criteria not completed.

**Table S2 (continuation).** Analysis of methodological quality (reporting bias) of all studies included in the systematic review.

| Quality criteria / Studies included       | Olmo et al. 2016 | Fauro et al. 2013 | Bazan et al. 2008 | Rivarola et al. 2005 | Lo Presti et al. 2001 | Rivarola et al. 2001 | Fournet et al. 2000 | Baillet et al. 1996 | Bazan et al. 2016 | Rivarola et al. 1999 | Strauss et al. 2013 | Gobbi et al. 2010 | Bustamente et al. 2010 | Paglani-Oliva et al. 1998 | Criteria completed (n) | Criteria completed (%) |
|-------------------------------------------|------------------|-------------------|-------------------|----------------------|-----------------------|----------------------|---------------------|---------------------|-------------------|----------------------|---------------------|-------------------|------------------------|---------------------------|------------------------|------------------------|
| <b><i>Materials and Methods</i></b>       |                  |                   |                   |                      |                       |                      |                     |                     |                   |                      |                     |                   |                        |                           |                        |                        |
| <i>Ethical statement</i>                  |                  |                   |                   |                      |                       |                      |                     |                     |                   |                      |                     |                   |                        |                           |                        |                        |
| 6 Ethical permissions                     | Y                | N                 | Y                 | Y                    | Y                     | N                    | N                   | N                   | Y                 | N                    | Y                   | Y                 | Y                      | N                         | 9                      | 60.0                   |
| <i>Study design</i>                       |                  |                   |                   |                      |                       |                      |                     |                     |                   |                      |                     |                   |                        |                           |                        |                        |
| 7 The experiment blinded                  | N                | N                 | N                 | N                    | N                     | N                    | N                   | N                   | N                 | N                    | N                   | N                 | N                      | N                         | 0                      | 0.0                    |
| 8 Dosage of treatment                     | Y                | Y                 | Y                 | Y                    | Y                     | Y                    | Y                   | Y                   | Y                 | Y                    | Y                   | Y                 | Y                      | Y                         | 15                     | 100.0                  |
| 9 Route of administration                 | N                | Y                 | Y                 | Y                    | Y                     | Y                    | Y                   | Y                   | Y                 | Y                    | Y                   | Y                 | Y                      | Y                         | 14                     | 93.3                   |
| 10 Duration of treatment                  | Y                | Y                 | Y                 | Y                    | Y                     | Y                    | Y                   | Y                   | Y                 | Y                    | Y                   | Y                 | Y                      | Y                         | 15                     | 100.0                  |
| 11 Period of treatment administration     | N                | N                 | N                 | N                    | N                     | N                    | N                   | N                   | N                 | N                    | N                   | N                 | N                      | N                         | 0                      | 0.0                    |
| 12 Site of treatment administration       | N                | Y                 | Y                 | Y                    | Y                     | Y                    | Y                   | Y                   | Y                 | Y                    | Y                   | Y                 | Y                      | Y                         | 14                     | 93.3                   |
| 13 Rationale for dosage choice            | N                | N                 | N                 | N                    | N                     | Y                    | N                   | N                   | N                 | N                    | N                   | N                 | N                      | Y                         | 2                      | 13.3                   |
| 14 Rational choice of administration rout | Y                | N                 | N                 | N                    | N                     | N                    | N                   | N                   | N                 | N                    | N                   | N                 | N                      | N                         | 1                      | 6.7                    |

Y, criteria completed; N, criteria not completed.

**Table S2 (continuation).** Analysis of methodological quality (reporting bias) of all studies included in the systematic review.

| Quality criteria / Studies included                                    | Olmo et al. 2016 | Fauro et al. 2013 | Bazan et al. 2008 | Rivarola et al. 2005 | Lo Presti et al. 2001 | Rivarola et al. 2001 | Fournet et al. 2000 | Baillet et al. 1996 | Bazan et al. 2016 | Rivarola et al. 1999 | Strauss et al. 2013 | Gobbi et al. 2010 | Bustamente et al. 2010 | Paglioni-Oliva et al. 1998 | Criteria completed (n) | Criteria completed (%) |      |
|------------------------------------------------------------------------|------------------|-------------------|-------------------|----------------------|-----------------------|----------------------|---------------------|---------------------|-------------------|----------------------|---------------------|-------------------|------------------------|----------------------------|------------------------|------------------------|------|
| <i>Experimental animals</i>                                            |                  |                   |                   |                      |                       |                      |                     |                     |                   |                      |                     |                   |                        |                            |                        |                        |      |
| 15 Strain of the animals                                               | N                | Y                 | Y                 | Y                    | Y                     | Y                    | Y                   | N                   | N                 | Y                    | Y                   | Y                 | Y                      | Y                          | Y                      | 12                     | 80.0 |
| 16 Sex of the animals                                                  | Y                | Y                 | N                 | Y                    | Y                     | Y                    | Y                   | Y                   | Y                 | Y                    | Y                   | Y                 | Y                      | N                          | Y                      | 12                     | 80.0 |
| 17 Weight range of the animals                                         | Y                | Y                 | Y                 | Y                    | N                     | Y                    | N                   | N                   | Y                 | Y                    | Y                   | Y                 | Y                      | N                          | Y                      | 11                     | 73.3 |
| 18 Age of the animals                                                  | Y                | N                 | N                 | N                    | N                     | N                    | N                   | Y                   | N                 | N                    | N                   | N                 | N                      | N                          | N                      | 2                      | 13.3 |
| 19 Previous procedures on the animals                                  | N                | N                 | N                 | N                    | N                     | N                    | N                   | N                   | N                 | N                    | N                   | N                 | N                      | N                          | N                      | 0                      | 0.0  |
| <i>Housing and husbandry</i>                                           |                  |                   |                   |                      |                       |                      |                     |                     |                   |                      |                     |                   |                        |                            |                        |                        |      |
| 20 Housing of experimental animals (type of facility, cage or housing) | N                | N                 | N                 | N                    | N                     | N                    | N                   | N                   | N                 | N                    | N                   | N                 | N                      | N                          | N                      | 0                      | 0.0  |
| 21 Experimental conditions (temperature, humidity and light cycle)     | Y                | N                 | N                 | N                    | N                     | N                    | N                   | N                   | N                 | N                    | N                   | N                 | N                      | N                          | N                      | 1                      | 6.7  |
| 22 Welfare-related assessments and interventions                       | N                | N                 | N                 | N                    | N                     | N                    | N                   | N                   | N                 | N                    | N                   | N                 | N                      | N                          | N                      | 0                      | 0.0  |

Y, criteria completed; N, criteria not completed.



**Table S2 (continuation).** Analysis of methodological quality (reporting bias) of all studies included in the systematic review.

| Quality criteria / Studies included |                                                                          | Olmo et al. 2016 | Fauro et al. 2013 | Bazan et al. 2008 | Rivarola et al. 2005 | Lo Presti et al. 2001 | Rivarola et al. 2001 | Fournet et al. 2000 | Baillet et al. 1996 | Bazan et al. 2016 | Rivarola et al. 1999 | Strauss et al. 2013 | Gobbi et al. 2010 | Bustamante et al. 2010 | Pagini-Oliva et al. 1998 | Criteria completed (n) | Criteria completed (%) |
|-------------------------------------|--------------------------------------------------------------------------|------------------|-------------------|-------------------|----------------------|-----------------------|----------------------|---------------------|---------------------|-------------------|----------------------|---------------------|-------------------|------------------------|--------------------------|------------------------|------------------------|
| <i>Sample size</i>                  |                                                                          |                  |                   |                   |                      |                       |                      |                     |                     |                   |                      |                     |                   |                        |                          |                        |                        |
| 23                                  | Report the total number of animals and animals in each group             | Y                | N                 | Y                 | Y                    | Y                     | Y                    | Y                   | N                   | Y                 | Y                    | Y                   | Y                 | Y                      | Y                        | 12                     | 80.0                   |
| 24                                  | Details of sample size calculation                                       | N                | N                 | N                 | N                    | N                     | N                    | N                   | N                   | N                 | N                    | N                   | N                 | N                      | N                        | 0                      | 0.0                    |
| <i>Animals allocation</i>           |                                                                          |                  |                   |                   |                      |                       |                      |                     |                     |                   |                      |                     |                   |                        |                          |                        |                        |
| 25                                  | Full details of animals allocation (including randomization or matching) | N                | N                 | N                 | N                    | N                     | N                    | Y                   | N                   | N                 | N                    | N                   | N                 | N                      | N                        | 1                      | 6.7                    |
| 26                                  | Order in which the animals and groups were treated and assessed          | N                | N                 | N                 | N                    | N                     | N                    | N                   | N                   | N                 | N                    | N                   | N                 | N                      | N                        | 0                      | 0.0                    |
| <i>Experimental outcomes</i>        |                                                                          |                  |                   |                   |                      |                       |                      |                     |                     |                   |                      |                     |                   |                        |                          |                        |                        |
| 27                                  | Clear experimental outcomes assessed                                     | Y                | Y                 | Y                 | Y                    | Y                     | Y                    | Y                   | Y                   | Y                 | Y                    | Y                   | Y                 | Y                      | Y                        | 15                     | 100.0                  |
| <i>Statistical methods</i>          |                                                                          |                  |                   |                   |                      |                       |                      |                     |                     |                   |                      |                     |                   |                        |                          |                        |                        |
| 28                                  | Statistical methods used in data analysis                                | N                | Y                 | Y                 | Y                    | Y                     | Y                    | Y                   | N                   | Y                 | Y                    | Y                   | Y                 | Y                      | Y                        | 12                     | 80.0                   |
| 29                                  | Assess whether the data met the assumptions of the statistical approach  | N                | N                 | N                 | N                    | N                     | N                    | N                   | N                   | N                 | N                    | N                   | N                 | N                      | N                        | 0                      | 0.00                   |

Y, criteria completed; N, criteria not completed.

**Table S2 (continuation).** Analysis of methodological quality (reporting bias) of all studies included in the systematic review.

| Quality criteria / Studies included | Olmo et al. 2016                                                         | Fauro et al. 2013 | Bazan et al. 2008 | Rivarola et al. 2005 | Lo Presti et al. 2001 | Rivarola et al. 2001 | Fournet et al. 2000 | Baillet et al. 1996 | Bazan et al. 2016 | Rivarola et al. 1999 | Strauss et al. 2013 | Gobbi et al. 2010 | Bustamante et al. 2010 | Paglini-Oliva et al. 1998 | Criteria completed (n) | Criteria completed (%) |
|-------------------------------------|--------------------------------------------------------------------------|-------------------|-------------------|----------------------|-----------------------|----------------------|---------------------|---------------------|-------------------|----------------------|---------------------|-------------------|------------------------|---------------------------|------------------------|------------------------|
| <b>Results</b>                      |                                                                          |                   |                   |                      |                       |                      |                     |                     |                   |                      |                     |                   |                        |                           |                        |                        |
| <i>Baseline data</i>                |                                                                          |                   |                   |                      |                       |                      |                     |                     |                   |                      |                     |                   |                        |                           |                        |                        |
| 30                                  | Description of health status of animals before treatment                 | N                 | N                 | N                    | N                     | N                    | N                   | N                   | N                 | N                    | N                   | N                 | N                      | N                         | 0                      | 0.0                    |
| <i>Outcomes and estimation</i>      |                                                                          |                   |                   |                      |                       |                      |                     |                     |                   |                      |                     |                   |                        |                           |                        |                        |
| 32                                  | Animals or data not included in the analysis (explanation for exclusion) | N                 | N                 | N                    | N                     | N                    | N                   | N                   | N                 | N                    | N                   | N                 | N                      | N                         | 0                      | 0.0                    |
| 33                                  | Information on parasitemia                                               | Y                 | Y                 | Y                    | Y                     | N                    | Y                   | Y                   | N                 | Y                    | Y                   | Y                 | N                      | Y                         | 11                     | 73.3                   |
| 34                                  | Information regarding inflammation                                       | N                 | Y                 | Y                    | N                     | Y                    | Y                   | N                   | N                 | Y                    | Y                   | Y                 | Y                      | Y                         | 10                     | 66.7                   |
| 35                                  | Information regarding animals' mortality                                 | N                 | Y                 | Y                    | Y                     | Y                    | Y                   | N                   | Y                 | Y                    | Y                   | N                 | Y                      | N                         | 11                     | 73.3                   |

Y, criteria completed; N, criteria not completed.

**Table S2 (continuation).** Analysis of methodological quality (reporting bias) of all studies included in the systematic review.

| Quality criteria / Studies included             | Olmo et al. 2016                                                            | Fauro et al. 2013 | Bazan et al. 2008 | Rivarola et al. 2005 | Lo Presti et al. 2001 | Rivarola et al. 2001 | Fournet et al. 2000 | Baillet et al. 1996 | Bazan et al. 2016 | Rivarola et al. 1999 | Strauss et al. 2013 | Gobbi et al. 2010 | Bustamante et al. 2010 | Paglini-Oliva et al. 1998 | Criteria completed (n) | Criteria completed (%) |
|-------------------------------------------------|-----------------------------------------------------------------------------|-------------------|-------------------|----------------------|-----------------------|----------------------|---------------------|---------------------|-------------------|----------------------|---------------------|-------------------|------------------------|---------------------------|------------------------|------------------------|
| <b>Discussion</b>                               |                                                                             |                   |                   |                      |                       |                      |                     |                     |                   |                      |                     |                   |                        |                           |                        |                        |
| <i>Interpretation / scientific implications</i> |                                                                             |                   |                   |                      |                       |                      |                     |                     |                   |                      |                     |                   |                        |                           |                        |                        |
| Interpretation of the results                   |                                                                             |                   |                   |                      |                       |                      |                     |                     |                   |                      |                     |                   |                        |                           |                        |                        |
| 37                                              | consider the objectives and hypotheses. current theory and relevant studies | Y                 | Y                 | Y                    | Y                     | Y                    | Y                   | Y                   | Y                 | Y                    | Y                   | Y                 | Y                      | Y                         | 15                     | 100.0                  |
| Comments on the study limitations               |                                                                             |                   |                   |                      |                       |                      |                     |                     |                   |                      |                     |                   |                        |                           |                        |                        |
| 38                                              | (sources of bias and limitations of the animal model)                       | N                 | N                 | N                    | N                     | N                    | N                   | N                   | N                 | N                    | N                   | N                 | N                      | N                         | 0                      | 0.0                    |
| <i>Generalizability/translation</i>             |                                                                             |                   |                   |                      |                       |                      |                     |                     |                   |                      |                     |                   |                        |                           |                        |                        |
| 39                                              | Comments on the relevance to human biology                                  | Y                 | Y                 | Y                    | Y                     | Y                    | Y                   | Y                   | Y                 | Y                    | Y                   | N                 | N                      | Y                         | 13                     | 86.7                   |
| <i>Funding</i>                                  |                                                                             |                   |                   |                      |                       |                      |                     |                     |                   |                      |                     |                   |                        |                           |                        |                        |
| 40                                              | List of funding sources                                                     | Y                 | Y                 | Y                    | Y                     | Y                    | Y                   | Y                   | Y                 | Y                    | Y                   | Y                 | Y                      | Y                         | 15                     | 100.0                  |
| <b>Criteria completed (n)</b>                   |                                                                             | 19                | 20                | 24                   | 21                    | 20                   | 22                  | 20                  | 15                | 20                   | 20                  | 21                | 19                     | 17                        | 20                     | <b>19.9 ± 2.1</b>      |
| <b>Criteria completed (%)</b>                   |                                                                             | 50.0              | 52.6              | 63.2                 | 55.3                  | 52.6                 | 58.0                | 52.6                | 39.5              | 52.6                 | 52.6                | 55.3              | 50.0                   | 44.7                      | 52.6                   | <b>52.3 ± 5.6</b>      |

Y, criteria completed; N, criteria not completed.

**Table S3.** General characteristics of all studies investigating the effect of trypanothione reductase inhibitors on experimental Chagas disease.

| <b>Authors</b>            | <b>Animal species</b> | <b>Lineage</b> | <b>Sex</b>      | <b>Age</b>  | <b>Weight</b> | <b><i>T. cruzi</i> strain</b> |
|---------------------------|-----------------------|----------------|-----------------|-------------|---------------|-------------------------------|
| Olmo et al. 2016          | Mice                  | Balb/C         | Female          | 6- 8 weeks  | 25 - 30 g     | CL Brener (?)                 |
| Lo Presti et al. 2015     | Mice                  | (-)            | (-)             | (-)         | (-)           | Tulahuen and SGO-Z12          |
| Fauro et al. 2013         | Mice                  | Swiss          | Male and Female | (-)         | 30 ± 1 g      | Tulahuen                      |
| Bazan et al. 2008         | Mice                  | Swiss          | (-)             | (-)         | 30 ± 1 g      | Tulahuen                      |
| Rivarola et al. 2005      | Mice                  | Swiss          | Male            | (-)         | 30 ± 1 g      | SGO-Z12                       |
| Lo Presti et al. 2004     | Mice                  | Swiss          | Male            | (-)         | (-)           | SGO-Z12                       |
| Rivarola et al. 2001      | Mice                  | Swiss          | Male            |             | 30 ± 1 g      | Tulahuen                      |
| (-)Fournet et al. 2000    | Mice                  | Balb/C         | Male and Female | 6 - 8 weeks | (-)           | (-)                           |
| Baillet et al. 1996       | Mice                  | Swiss          | Female          | (-)         | 20 - 25 g     | (-)                           |
| Bazan et al. 2016         | Mice                  | Swiss          | Male and Female | (-)         | 30 ± 1 g      | Tulahuen                      |
| Rivarola et al. 1999      | Mice                  | Swiss          | Male            | (-)         | 30 ± 1 g      | Tulahuen                      |
| Strauss et al. 2013       | Mice                  | Swiss          | Male and Female | (-)         | 30 ± 1 g      | Tulahuen                      |
| Gobbi et al. 2010         | Mice                  | Swiss          | Male            | (-)         | 30 ± 1 g      | Tulahuen                      |
| Bustamante et al. 2007    | Mice                  | Swiss          | (-)             | (-)         | (-)           | Tulahuen and SGO-Z12          |
| Paglini-Oliva et al. 1998 | Mice                  | Swiss          | Male            | (-)         | 30 ± 1 g      | Tulahuen                      |

(-) Data not reported or not investigated. (?) *T. cruzi* CL Brener strain was not reported for mice infection but was quoted in PCR analysis.

**Table S3 (continuation).** General characteristics of all included studies.

| <b>Authors</b>            | <b>Treatment tested</b>                                | <b>Administration route</b> | <b>Dose</b>              | <b>Treatment (days)</b> |
|---------------------------|--------------------------------------------------------|-----------------------------|--------------------------|-------------------------|
| Olmo et al. 2016          | Tetraamina-based drugs                                 | (-)                         | 5 mg/kg                  | 5                       |
| Lo Presti et al. 2015     | Thioridazine                                           | Oral                        | 80 mg/kg                 | Acute: 3 / Chronic: 12  |
| Fauro et al. 2013         | Clomipramine                                           | Intraperitoneal             | 5 mg/kg                  | 60                      |
| Bazan et al. 2008         | Clomipramine                                           | Intraperitoneal             | 5 mg/kg                  | 30                      |
| Rivarola et al. 2005      | Clomipramine                                           | Intraperitoneal             | 5 and 40 mg/kg           | 30 and 60               |
| Lo Presti et al. 2004     | Thioridazine                                           | Oral                        | 80 mg/kg                 | 3                       |
| Rivarola et al. 2001      | Clomipramine                                           | Intraperitoneal             | 5 and 40mg/kg            | 7 and 30                |
| Fournet et al. 2000       | Bisbenzylisoquinolone alkaloids                        | Oral                        | 25 mg/kg                 | 30                      |
| Baillet et al. 1996       | Diphenylsulfide (2-amino diphenylsulfides) derivatives | Oral and intraperitoneal    | 40 mg/kg                 | 4                       |
| Bazan et al. 2016         | Clomipramine                                           | Intraperitoneal             | 5 mg/kg                  | 60                      |
| Rivarola et al. 1999      | Thioridazine                                           | Oral                        | 80 mg/kg                 | 3                       |
| Strauss et al. 2013       | Clomipramine                                           | Intraperitoneal             | 5 mg/kg                  | 30                      |
| Gobbi et al. 2010         | Clomipramine                                           | Intraperitoneal and Oral    | 5 mg/kg;                 | 90                      |
| Bustamante et al. 2007    | Thioridazine                                           | Oral                        | 80 mg/kg                 | 12 and 30               |
| Paglini-Oliva et al. 1998 | Thioridazine                                           | Oral                        | 4, 5, 6, 16 and 80 mg/kg | 3                       |

(-) Data not reported or not investigated.

**Table S4.** Parasitemia and mortality in control infected mice and those treated with trypanothione reductase inhibitors.

| Study                 | Groups of treatment / animals per group (n) | Groups        | Infection stage | Parasitemia (blood tryp./mL × 10 <sup>3</sup> ) |       | Survival, n (%) |
|-----------------------|---------------------------------------------|---------------|-----------------|-------------------------------------------------|-------|-----------------|
| Olmo et al. 2016      | Control infected (n=6)                      | Untreated     | Acute phase     | 60.24                                           | 0.05  | 6 (100%)        |
|                       | Compoud 2 (n=6)                             | 5 mg/kg       |                 | 38.27                                           | 0.05  | 6 (100%)        |
|                       | Compoud 3 (n= 6)                            | 5 mg/kg       |                 | 40.00                                           | 0.04  | 6 (100%)        |
|                       | Compoud 5 (n=6)                             | 5 mg/kg       |                 | 44.35                                           | 0.05  | 6 (100%)        |
| Lo Presti et al. 2015 | Control infected Tul (n=25)                 | Untreated     | Acute phase     | (-)                                             | (-)   | 5 (20%)         |
|                       | Infected treated Tul (n=60)                 | TZ (80 mg/kg) |                 | (-)                                             | (-)   | 48 (80%)        |
|                       | Control infected SGO (n=42)                 | Untreated     |                 | (-)                                             | (-)   | 26 (44%)        |
|                       | Infected treated SGO (n=42)                 | TZ (80 mg/kg) |                 | (-)                                             | (-)   | 7 (17.5%)       |
| Fauro et al. 2013     | Control infected (n= 25)                    | Untreated     | Chronic phase   | (-)                                             | (-)   | 4 (15%)         |
|                       | Infected treated (n= 30)                    | CLO (5 mg/kg) |                 | (-)                                             | (-)   | 7 (22%)         |
| Bazan et al. 2008     | Control infected (n= 21)                    | Untreated     | Acute phase     | (-)                                             | (-)   | 11 (48%)        |
|                       | Infected treated (n= 37)                    | CLO (5 mg/kg) |                 | 101.13                                          | 13.98 | 33 (90%)        |
| Lo Presti et al. 2004 | Control infected (n= 42)                    | TZ (80 mg/kg) | Chronic phase   | (-)                                             | (-)   | 8 (20%)         |
|                       | Infected treated (n= 42)                    |               |                 |                                                 |       | 21 (50%)        |

(-) Data not reported or not investigated, TZ, Thioridazine; CLO, clomipramine; Ceph, cepharanthine; Daph, daphnoline; SGO, SGO-Z12 *T. cruzi* strain; TUL, Tulahuen *T. cruzi* strain. Parasitemia: mean and standard error (mean ± SE). Survival: absolute number and percentage, n (%).

**Table S4 (continuation).** Parasitemia and mortality in control infected mice and those treated with trypanothione reductase inhibitors.

| Study                | Groups of treatment / animals per group (n) | Groups         | Infection stage | Parasitemia (blood tryp./mL × 10 <sup>3</sup> ) |       | Survival, n (%) |
|----------------------|---------------------------------------------|----------------|-----------------|-------------------------------------------------|-------|-----------------|
| Rivarola et al. 2005 |                                             | Untreated      |                 | 455.20                                          | 52.04 | 12 (30%)        |
|                      | Control infected (n= 40)                    | CLO (5 mg/kg)  | Acute phase     | 29.15                                           | 2.21  | 28 (70%)        |
|                      | Clomipramine 5 (n= 40)                      | CLO (40 mg/kg) |                 | 69.66                                           | 1.62  | 24 (60%)        |
|                      | Clomipramine 40 (n= 40)                     | Untreated      |                 | 0.00                                            | 0.00  | (-)             |
|                      |                                             | CLO (5 mg/kg)  | Chronic phase   | 0.00                                            | 0.00  | (-)             |
|                      |                                             | CLO (40 mg/kg) |                 | 0.00                                            | 0.00  | (-)             |
| Rivarola et al. 2001 |                                             | Untreated      |                 | 93.19                                           | 19.79 | 14 (70%)        |
|                      | Control infected (n= 20)                    | CLO (5 mg/kg)  | Acute phase     | 10.53                                           | 14.36 | 32 (80%)        |
|                      | Clomipramine 5 (n= 40)                      | CLO (40 mg/kg) |                 | 7.34                                            | 14.36 | 36 (90%)        |
|                      | Clomipramine 40 (n= 40)                     | Untreated      |                 | 0.00                                            | 0.00  | 16 (80%)        |
|                      |                                             | CLO (5 mg/kg)  | Chronic phase   | 0.00                                            | 0.00  | 30 (75%)        |
|                      |                                             | CLO (40 mg/kg) |                 | 0.00                                            | 0.00  | 28 (70%)        |

(-) Data not reported or not investigated, TZ, Thioridazine; CLO, clomipramine; Ceph, cepharanthine; Daph, daphnoline; SGO, SGO-Z12 *T. cruzi* strain; TUL, Tulahuen *T. cruzi* strain. Parasitemia: mean and standard error (mean ± SE). Survival: absolute number and percentage, n (%).

**Table S4 (continuation).** Parasitemia and mortality in control infected mice and those treated with trypanothione reductase inhibitors.

| Study                    | Groups of treatment / animals per group (n) | Groups          | Infection stage | Parasitemia (blood tryp./mL × 10 <sup>3</sup> ) |        | Survival, n (%) |
|--------------------------|---------------------------------------------|-----------------|-----------------|-------------------------------------------------|--------|-----------------|
| Fournet et al. 2000      | Parasitological assays:                     |                 |                 |                                                 |        |                 |
|                          | Control infected (n= 10-15)                 | Untreated       | Acute phase     | 143.72                                          | 8.31   | 38 (85%)        |
|                          | Cepharanthine (n= 10-15)                    | Ceph (25 mg/kg) |                 | 204.21                                          | 16.06  | 20 (57%)        |
|                          | Daphnoline (n= 10-15)                       | Daph (25 mg/kg) |                 | 98.31                                           | 11.27  | 33 (74%)        |
|                          | Mortality assays:                           |                 |                 |                                                 |        |                 |
|                          | Control infected (n= 45)                    | Untreated       | Chronic phase   | 0.54                                            | 0.02   | 30 (67%)        |
|                          | Cepharanthine (n= 35)                       | Ceph (25 mg/kg) |                 | 3.36                                            | 0.19   | 20 (57%)        |
|                          | Daphnoline (n= 45)                          | Daph (25 mg/kg) |                 | 0.27                                            | 0.013  | 25 (56%)        |
|                          | Bazan et al. 2016                           |                 | Untreated       | Acute phase                                     | 108.81 | 9.85            |
| Control infected (n= 10) |                                             | CLO (5 mg/kg)   | (-)             |                                                 | (-)    | (-)             |
| Clomipramine (n= 10)     |                                             | Untreated       | Chronic phase   | (-)                                             | (-)    | 6 (63%)         |
|                          |                                             | CLO (5 mg/kg)   |                 | (-)                                             | (-)    | 7 (67%)         |

(-) Data not reported or not investigated, TZ, Thioridazine; CLO, clomipramine; Ceph, cepharanthine; Daph, daphnoline; SGO, SGO-Z12 *T. cruzi* strain; TUL, Tulahuen *T. cruzi* strain. Parasitemia: mean and standard error (mean ± SE). Survival: absolute number and percentage, n (%).



**Table S4 (continuation).** Parasitemia and mortality in control infected mice and those treated with trypanothione reductase inhibitors.

| Study                     | Groups of treatment / animals per group (n) | Groups        | Infection stage | Parasitemia (blood tryp./mL × 10 <sup>3</sup> ) |       | Survival, n (%) |
|---------------------------|---------------------------------------------|---------------|-----------------|-------------------------------------------------|-------|-----------------|
| Rivarola et al. 1999      | Control infected (n= 20)                    | Untreated     | Acute phase     | 52.81                                           | 11.32 | 8 (40%)         |
|                           |                                             | TZ (80 mg/kg) |                 | 12.49                                           | 2.06  | 54 (90%)        |
|                           | Thioridazine (n= 60)                        | Untreated     | Chronic phase   | 0.00                                            | 0.00  | 16 (80%)        |
|                           |                                             | TZ (80 mg/kg) |                 | 0.00                                            | 0.00  | 12 (20%)        |
| Strauss et al. 2013       | Control infected (n= 20)                    | Untreated     | Acute phase     | 50.34                                           | 1.74  | 9 (45%)         |
|                           | Clomipramine (n= 20)                        | CLO (5 mg/kg) |                 | 25.95                                           | 2.14  | 11 (55%)        |
| Gobbi et al. 2010         | Control infected (n= 20)                    | Untreated     | Acute phase     | 38.07                                           | 6.40  | (-)             |
|                           | Clomipramine (n= 20)                        | CLO (5 mg/kg) |                 | 21.68                                           | 3.58  | (-)             |
| Bustamante et al. 2007    | TUL infected (n= 25)                        | Untreated     | Chronic phase   | (-)                                             | (-)   | 7 (30%)         |
|                           | TUL inf. + Thioridazine (n= 25)             | TZ (80 mg/kg) |                 | (-)                                             | (-)   | 22 (88%)        |
|                           | SGO-Z12 infected (n= 20)                    | Untreated     |                 | (-)                                             | (-)   | 8 (40%)         |
|                           | SGO-Z12 inf. + Thioridazine (n= 20)         | TZ (80 mg/kg) |                 | (-)                                             | (-)   | 18 (88%)        |
| Paglini-Oliva et al. 1998 | Control infected (n= 100)                   | Untreated     | Acute phase     | 31.97                                           | 3.80  | (-)             |
|                           | Thioridazine (n= 25)                        | TZ (80 mg/kg) |                 | 31.20                                           | 1.80  | (-)             |

(-) Data not reported or not investigated, TZ, Thioridazine; CLO, clomipramine; Ceph, cepharanthine; Daph, daphnoline; SGO, SGO-Z12 *T. cruzi* strain; TUL, Tulahuen *T. cruzi* strain. Parasitemia: mean and standard error (mean ± SE). Survival: absolute number and percentage, n (%).

**Table S5.** Parasitic load and cure rate in studies using polymerase chain reaction (PCR) or serology.

| Study                       | Groups (mice)         | Parasitic load (Parasite equivalent / ng DNA) | Cure, n (%)         |
|-----------------------------|-----------------------|-----------------------------------------------|---------------------|
| Olmo <i>et al.</i> 2016*    | Untreated (n=6)       | (-)                                           | 0 (0%)              |
|                             | Compound 2 (n=6)      |                                               | 2 (33.33%)          |
|                             | Compound 3 (n=6)      |                                               | 3 (50%)             |
|                             | Compound 5 (n=6)      |                                               | 0 (0%)              |
| Fauro <i>et al.</i> 2013*   | Untreated (n=25)      | (-)                                           | ?                   |
|                             | CLO (5 mg/kg) (n=30)  |                                               |                     |
| Strauss <i>et al.</i> 2013* | Untreated (n=20)      | (-)                                           | 0 (0%) <sup>†</sup> |
|                             | CLO (5 mg/kg) (n=20)  |                                               | 0 (0%) <sup>†</sup> |
| Bazan <i>et al.</i> 2016*   | Untreated (n=10)      | 90.47 ± 51.28                                 | 7 (75.87%)          |
|                             | CLO (5 mg/kg) (n=10)  | 30.76 ± 7.69                                  | 8 (79.76%)          |
| Fournet <i>et al.</i> 2000# | Untreated (n= 60)     | (-)                                           | 10 (17%)            |
|                             | Cepharanthine (n= 47) | (-)                                           | 24 (51%)            |
|                             | Daphnoline (n= 55)    | (-)                                           | 46 (84%)            |

\*PCR, # Serology. (-) Not investigated. (?) Inconclusive analysis due to limited sample or absence of measures for each mice. <sup>†</sup>Information was reported in the results, but no graphical element was presented.

**Table S6.** Electrocardiographic data from control infected mice and those treated with trypanothione reductase inhibitors.

| Authors                | Days post-infection | Groups                      | Pulse          |               |               |               |
|------------------------|---------------------|-----------------------------|----------------|---------------|---------------|---------------|
|                        |                     |                             | (beats/min)    | Axes (grade)  | PQ Interval   | QRS Interval  |
| Rivarola et al. 2001   | 35                  | Untreated (n=20)            | 268.00 ± 5.53  | 57.00 ± 3.00  | 0.02-0.04     | 0.02-0.03     |
|                        |                     | CLO 5mg/kg (n=40)           | 260.00 ± 41.00 | 63.00 ± 2.84  | 0.02-0.04     | 0.02-0.04     |
|                        |                     | CLO 40mg/kg (n=40)          | 255.00 ± 4.43  | 60.00 ± 6.17  | 0.02-0.04     | 0.02-0.03     |
|                        | 75                  | Untreated (n=20)            | 263.00 ± 4.90  | 55.00 ± 3.95  | 0.02-0.03     | 0.02-0.04     |
|                        |                     | CLO 5mg/kg (n=40)           | 286.00 ± 3.48  | 65.00 ± 5.22  | 0.02-0.04     | 0.03-0.04     |
|                        |                     | CLO 40mg/kg (n=40)          | 282.00 ± 3.95  | 59.00 ± 4.27  | 0.02-0.05     | 0.03-0.04     |
|                        | 135                 | Untreated (n=20)            | 263.00 ± 6.48  | 55.00 ± 5.22  | 0.02-0.04     | 0.03-0.05     |
|                        |                     | CLO 5mg/kg (n=40)           | 260.00 ± 5.53  | 67.00 ± 4.74  | 0.02-0.02     | 0.02-0.03     |
|                        |                     | CLO 40mg/kg (n=40)          | 295.00 ± 4.43  | 57.00 ± 3.32  | 0.02-0.05     | 0.03-0.04     |
| Bustamante et al. 2007 | 215                 | Untreated (Tul) (n=25)      | 570.00 ± 20.00 | 45.00 ± 10.00 | 0.027 ± 0.001 | 0.017 ± 0.001 |
|                        |                     | Tul + TZ 80mg/kg (n=25)     | 586.00 ± 10.00 | 31.00 ± 8.00  | 0.022 ± 0.001 | 0.015 ± 0.001 |
|                        |                     | Untreated (SGO-Z12) (n=19)  | 500.00 ± 15.00 | 50.00 ± 2.00  | 0.03 ± 0.002  | 0.035 ± 0.01  |
|                        |                     | SGO-Z12 + TZ 80mg/kg (n=20) | 495.00 ± 15.00 | 41.00 ± 2.50  | 0.015 ± 0.001 | 0.015 ± 0.002 |
|                        | 350                 | Untreated (Tul) (n=25)      | 569.00 ± 29.00 | 38.00 ± 15.00 | 0.024 ± 0.001 | 0.015 ± 0.001 |
|                        |                     | Untreated (SGO-Z12) (n=19)  | 470.00 ± 12.00 | 48.00 ± 3.00  | 0.034 ± 0.01  | 0.035 ± 0.01  |
|                        |                     | Tul + TZ 80mg/kg (n=25)     | 586.00 ± 11.00 | 20.00 ± 6.00  | 0.022 ± 0.001 | 0.014 ± 0.001 |
|                        |                     | SGO-Z12 + TZ 80mg/kg (n=16) | 515.00 ± 45.00 | 35.00 ± 5.50  | 0.02 ± 0.001  | 0.016 ± 0.001 |

Pulse and axes: mean and standard error (mean ± SE). PQ and QRS intervals: maximum and minimum.

**Table S6 (continuation).** Electrocardiographic data from infected untreated mice and those treated with trypanothione reductase inhibitors.

| Authors              | Days post-infection | Groups             | Pulse (beats/min) | Axes (grade)  | PQ Interval | QRS Interval |
|----------------------|---------------------|--------------------|-------------------|---------------|-------------|--------------|
| Rivarola et al. 1999 | 35                  | Untreated (n=10)   | 468.00 ± 12.10    | 51.00 ± 4.70  | 0.02-0.04   | 0.02-0.03    |
|                      |                     | TZ 80mg/kg (n=10)  | 498.00 ± 15.80    | 60.00 ± 5.10  | 0.02-0.04   | 0.02-0.03    |
|                      | 75                  | Untreated (n=10)   | 575.00 ± 4.80     | 44.00 ± 2.30  | 0.03-0.04   | 0.02-0.04    |
|                      |                     | TZ 80mg/kg (n=10)  | 519.00 ± 15.10    | 58.00 ± 4.90  | 0.02-0.04   | 0.02-0.04    |
|                      | 135                 | Untreated (n=10)   | 526.00 ± 16.90    | 55.00 ± 2.90  | 0.02-0.05   | 0.02-0.06    |
|                      |                     | TZ 80mg/kg (n=10)  | 503.00 ± 14.90    | 63.00 ± 3.80  | 0.02-0.04   | 0.02-0.04    |
| Rivarola et al. 2005 | 55                  | Untreated (n=40)   | 501.80 ± 15.80    | 44.00 ± 6.00  | 0.015-0.03  | 0.02-0.04    |
|                      |                     | CLO 5mg/kg (n=40)  | 483.00 ± 54.70    | 32.00 ± 8.30  | 0.01-0.03   | 0.01-0.01    |
|                      |                     | CLO 40mg/kg (n=40) | 464.00 ± 67.00    | 34.00 ± 27.00 | 0.01- 0.03  | 0.01-0.01    |
|                      | 90                  | Untreated (n=40)   | 509.70 ± 17.50    | 48.30 ± 8.40  | 0.02-0.04   | 0.02-0.04    |
|                      |                     | CLO 5mg/kg (n=40)  | 560.00 ± 54.70    | 36.00 ± 19.00 | 0.01-0.02   | 0.01-0.01    |
|                      |                     | CLO 40mg/kg (n=40) | 560.00 ± 51.60    | 57.00 ± 8.20  | 0.01-0.02   | 0.01-0.01    |
|                      | 135                 | Untreated (n=40)   | 467.70 ± 12.00    | 38.20 ± 6.50  | 0.015-0.03  | 0.015-0.07   |
|                      |                     | CLO5mg/kg (n=40)   | 510.00 ± 22.00    | 57.00 ± 10.00 | 0.01-0.02   | 0.01-0.01    |
| Bazan et al. 2008    | 150                 | Untreated (n= 7)   | 668.00 ± 27.40    | 36.20 ± 4.9 0 | N           | N            |
|                      |                     | CLO 5mg/kg (n= 31) | 622.00 ± 12.00    | 53.20 ± 4.12  | N           | N            |
| Strauss et al. 2013  | 90                  | Untreated (n= 9)   | 491.25 ± 2.10     | N             | N           | N            |
|                      |                     | CLO 5mg/kg (n=13)  | 500.50 ± 27.14    | N             | N           | N            |

N, not investigated. Pulse and axes: mean and standard error (mean ± SE). PQ and QRS intervals: maximum and minimum.

**Table S7.** Electrocardiographic abnormalities and  $\beta$ -adrenergic receptors affinity and density in control and treated mice.

| Authors                | Days post-inf. | Groups                      | Abnormality, n (%) | $\beta$ affinity (nM) | $\beta$ density (mol/mg protein) |
|------------------------|----------------|-----------------------------|--------------------|-----------------------|----------------------------------|
| Rivarola et al. 2001   | 35             | Untreated (n=20)            | 7 (35%)            | $5.63 \pm 0.26$       | $78.25 \pm 1.67$                 |
|                        |                | CLO 5mg/kg (n=40)           | 17 (42%)           | $7.46 \pm 1.12$       | $73.32 \pm 4.73$                 |
|                        |                | CLO 40mg/kg (n=40)          | 17 (43%)           | $4.83 \pm 0.72$       | $76.06 \pm 4.18$                 |
|                        | 75             | Untreated (n=20)            | 10 (50%)           | $6.86 \pm 0.20$       | $77.28 \pm 0.91$                 |
|                        |                | CLO 5mg/kg (n=40)           | 25 (62%)           | $0.900 \pm 0.18$      | $30.42 \pm 1.59$                 |
|                        |                | CLO 40mg/kg (n=40)          | 19 (48%)           | $2.93 \pm 0.53$       | $55.66 \pm 4.12$                 |
|                        | 135            | Untreated (n=20)            | 18 (90%)           | $11.21 \pm 0.25$      | $53.33 \pm 0.71$                 |
|                        |                | CLO 5mg/kg (n=40)           | 0 (0%)             | $4.56 \pm 0.98$       | $65.02 \pm 4.88$                 |
|                        |                | CLO 40mg/kg (n=40)          | 25 (63%)           | $4.43 \pm 1.22$       | $63.35 \pm 6.01$                 |
| Bustamante et al. 2007 | 215            | Untreated (Tul) (n=20)      | 16 (65%)           | N                     | N                                |
|                        |                | Tul + TZ 80mg/kg (n=40)     | 9 (36.7%)          | N                     | N                                |
|                        |                | Untreated (SGO-Z12) (n=20)  | 12 (62%)           | N                     | N                                |
|                        | 350            | SGO-Z12 + TZ 80mg/kg (n=40) | 7 (33%)            | N                     | N                                |
|                        |                | Untreated (Tul) (n=20)      | 17 (66.6%)         | N                     | N                                |
|                        |                | Tul + TZ 80mg/kg (n=40)     | 11 (43.3%)         | N                     | N                                |
|                        |                | Untreated (SGO-Z12) (n=20)  | 13 (63%)           | N                     | N                                |
|                        |                | SGO-Z12 + TZ80mg/kg (n=40)  | 5 (33%)            | N                     | N                                |

N, not investigated. Affinity and density of  $\beta$ -adrenergic receptors: mean and standard error (mean  $\pm$  SE).

**Table S7 (continuation).** Electrocardiographic abnormalities and  $\beta$ -adrenergic receptors affinity and density in control and treated mice.

| Authors              | Days post-inf. | Groups             | Abnormality, n (%) | $\beta$ affinity (nM) | $\beta$ density (mol/mg protein) |
|----------------------|----------------|--------------------|--------------------|-----------------------|----------------------------------|
| Rivarola et al. 1999 | 35             | Untreated (n=10)   | 1 (12.5%)          | $5.63 \pm 0.27$       | $78.25 \pm 1.67$                 |
|                      |                | TZ 80mg/kg (n=10)  | 2 (16%)            | $6.84 \pm 0.36$       | $76.85 \pm 1.69$                 |
|                      | 75             | Untreated (n=10)   | 7 (66%)            | $6.86 \pm 0.21$       | $77.28 \pm 0.91$                 |
|                      |                | TZ 80mg/kg (n=10)  | 4 (40%)            | $5.82 \pm 0.32$       | $74.37 \pm 1.57$                 |
|                      | 135            | Untreated (n=10)   | 6 (60%)            | $11.21 \pm 0.26$      | $53.33 \pm 0.71$                 |
|                      |                | TZ 80mg/kg (n=10)  | 4 (37%)            | $5.48 \pm 0.21$       | $72.34 \pm 1.06$                 |
| Rivarola et al. 2005 | 55             | Untreated (n=40)   | 2 (18%)            | $5.71 \pm 0.56$       | $207.60 \pm 8.10$                |
|                      |                | CLO 5mg/kg (n=40)  | 1 (11%)            | $9.05 \pm 0.86$       | $271.30 \pm 10.10$               |
|                      |                | CLO 40mg/kg (n=40) | 2 (17%)            | $6.06 \pm 0.70$       | $255.90 \pm 10.00$               |
|                      | 90             | Untreated (n=40)   | 4 (36%)            | $6.28 \pm 0.40$       | $228.00 \pm 6.02$                |
|                      |                | CLO 5mg/kg (n=40)  | 2 (20%)            | $8.10 \pm 0.80$       | $292.20 \pm 11.20$               |
|                      |                | CLO 40mg/kg (n=40) | 1 (10%)            | $5.32 \pm 0.44$       | $249.80 \pm 6.60$                |
|                      | 135            | Untreated (n=40)   | 5 (55%)            | $7.32 \pm 0.19$       | $184.10 \pm 2.10$                |
|                      |                | CLO 5mg/kg (n=40)  | 2 (18%)            | $7.74 \pm 0.94$       | $302.40 \pm 13.6$                |
|                      |                | CLO40mg/kg (n=40)  | 2 (16%)            | $4.90 \pm 0.48$       | $230.60 \pm 6.98$                |

N, not investigated. Affinity and density of  $\beta$ -adrenergic receptors: mean and standard error (mean  $\pm$  SE).

**Table S7 (continuation).** Electrocardiographic abnormalities and  $\beta$ -adrenergic receptors affinity and density in control and treated mice.

| Authors           | Days post-inf. | Groups            | Abnormality, n (%) | $\beta$ affinity (nM) | $\beta$ density (mol/mg protein) |
|-------------------|----------------|-------------------|--------------------|-----------------------|----------------------------------|
| Bazan et al. 2008 | 150            | Untreated (n= 7)  | N                  | $11.20 \pm 0.26$      | $53.30 \pm 0.71$                 |
|                   |                | CLO 5mg/kg        | N                  | $6.27 \pm 0.23$       | $77.20 \pm 1.08$                 |
| Bazan et al. 2016 | 90             | Untreated (n=10)  | 4 (36%)            | N                     | N                                |
|                   |                | CLO 5mg/kg (n=10) | 3 (33%)            | N                     | N                                |
|                   | 180            | Untreated (n=10)  | 5 (50%)            | N                     | N                                |
|                   |                | CLO5mg/kg (n=10)  | 6 (64%)            | N                     | N                                |
|                   | 270            | Untreated (n=10)  | 6 (57%)            | N                     | N                                |
|                   |                | CLO 5mg/kg (n=10) | 2 (20%)            | N                     | N                                |

N, not investigated. N, not investigated. Affinity and density of  $\beta$ -adrenergic receptors: mean and standard error (mean  $\pm$  SE).

**Table S8.** Descriptive results obtained in infected mice treated with trypanothione reductase inhibitors compared to infected untreated mice.

| <b>Authors</b>        | <b>Treatment</b>           | <b>Immunological, histopathological and biochemical findings</b>                               | <b>Electrocardiographic findings</b>                                                                    |
|-----------------------|----------------------------|------------------------------------------------------------------------------------------------|---------------------------------------------------------------------------------------------------------|
| Olmo et al. 2016      | Tetraamine-based compounds | Compound 3 reduced uric acid, urea and CK-MB. LDH levels (30% - 40%) in treated mice           | N                                                                                                       |
| Lo Presti et al. 2015 | Thioridazine               | Reduced necrosis, fibrosis and inflammatory infiltrate in treated mice                         | Prevented cardiomyopathy progression and reduced electrocardiographic abnormalities (cardiac blockades) |
| Fauro et al. 2013     | Clomipramine               | Reduced myocarditis, fibrosis, anti- <i>T. cruzi</i> antibodies serum levels and parasite load | N                                                                                                       |
| Bazan et al. 2008     | Clomipramine               | Reduced heart inflammatory infiltrate and necrosis                                             | Reduced cardiomyopathy progression and electrocardiographic abnormalities                               |
| Rivarola et al. 2005  | Clomipramine               | Similar anti-cruzipain IgG serum levels and reduced inflammatory infiltrate                    | Reduced electrocardiographic abnormalities (pulse, axes, PQ and QRS intervals)                          |
| Rivarola et al. 2005  | Clomipramine               | Similar anti-cruzipain IgG serum levels and reduced inflammatory infiltrate                    | Reduced electrocardiographic abnormalities (pulse, axes, PQ and QRS intervals)                          |

\*Benznidazole was used as a reference antitrypanosomal drug. N, not investigated.



**Table S8 (continuation).** Descriptive results obtained in infected mice treated with trypanothione reductase inhibitors compared to infected untreated mice.

| <b>Authors</b>        | <b>Treatment</b>                | <b>Immunological, histopathological and biochemical findings</b>                                         | <b>Electrocardiographic findings</b>                                                                          |
|-----------------------|---------------------------------|----------------------------------------------------------------------------------------------------------|---------------------------------------------------------------------------------------------------------------|
| Lo Presti et al. 2004 | Thioridazine                    | Similar anti-cruzipain IgG serum levels and reduced inflammatory infiltrate                              | Reduced $\beta$ -receptors affinity and higher $\beta$ -receptors density                                     |
| Rivarola et al. 2001  | Clomipramine                    | Reduced anti-cruzipain IgG antibody serum levels in treated groups                                       | Reduced receptor density, affinity and electrocardiographic abnormalities (pulse, axes, PQ and QRS intervals) |
| Fournet et al. 2000   | Bisbenzylisoquinolone alkaloids | N                                                                                                        | N                                                                                                             |
| Baillet et al. 1996   | Diphenylsulfide derivatives     | N                                                                                                        | N                                                                                                             |
| Bazan et al. 2016     | Clomipramine                    | Similar anti- <i>T. cruzi</i> antigens serum levels. Reduced parasitic DNA in blood samples              | Attenuation of intra-ventricular block and arrhythmias                                                        |
| Rivarola et al. 1999  | Thioridazine                    | Similar anti-cruzipain IgG serum levels, reduced inflammatory infiltrate and absence of amastigote nests | Attenuation of intra-ventricular block and arrhythmias. Reduced receptor affinity and higher density          |

N, not investigated.

**Table S8 (continuation).** Descriptive results obtained in infected mice treated with trypanothione reductase inhibitors compared to infected untreated mice.

| <b>Authors</b>            | <b>Treatment</b> | <b>Immunological, histopathological and biochemical findings</b>                                              | <b>Electrocardiographic findings</b>                                                                                    |
|---------------------------|------------------|---------------------------------------------------------------------------------------------------------------|-------------------------------------------------------------------------------------------------------------------------|
| Strauss et al. 2013       | Clomipramine     | Absence of necrosis, similar fibrosis and inflammatory infiltrate. No evidences of liver and kidney toxicity. | No prevented prolonged PR interval (atrioventricular block)                                                             |
| Gobbi et al. 2010         | Clomipramine     | Similar anti-cruzipain IgG serum levels and reduced myocardial damage                                         | Reduced $\beta$ -receptor affinity and higher density.<br>No electrocardiographic abnormalities                         |
| Bustamante et al. 2007    | Thioridazine     | Reduced heart necrosis, fibrosis and inflammatory infiltrate                                                  | Reduced $\beta$ -receptor density, affinity, and electrocardiographic abnormalities (pulse, axes, PQ and QRS intervals) |
| Paglini-oliva et al. 1998 | Thioridazine     | Reduced inflammatory infiltrates and no amastigote nests                                                      | Prevented cardiomyopathy progression                                                                                    |

N, not investigated.
